# Supplementary material
Source: PubMed Central journal article supplement (PMC3711294)
Supplement: supp_M113.465369_jbc.M113.465369-1.pdf [file supp_M113.465369_jbc.M113.465369-1.pdf]

**Supplemental Table I: Nucleotide sequence of primers.**

| <b>Mutant name</b>        | <b>Primer nucleotide sequence<br/>F: forward primer, R: Reverse primer<br/>(bold type indicates those nucleotides different from wild-type.)</b> |
|---------------------------|--------------------------------------------------------------------------------------------------------------------------------------------------|
| ABI5 <sup>91-442</sup>    | F: GCAGGTTACATTCTGTTCC R: CGAGCCTGCTTTTTTGATC                                                                                                    |
| ABI5 <sup>179-442</sup>   | F: CGTAGTAGTAGTAGTAATGGACAGAAC R: CGAGCCTGCTTTTTTGATC                                                                                            |
| ABI5 <sup>271-442</sup>   | F: TCAGGTTATGCTAAAAGGACAG R: CGAGCCTGCTTTTTTGATC                                                                                                 |
| ABI5 <sup>179-270</sup>   | F: GACCCAGCTTTCTTGACAAAAGTTGG R: TGGGTCACCCACACCCATA                                                                                             |
| ABI5 <sup>1-270</sup>     | F: GACCCAGCTTTCTTGACAAAAGTTGG R: TGGGTCACCCACACCCATA                                                                                             |
| ABI5 <sup>1-343</sup>     | F: GACCCAGCTTTCTTGACAAAAGTTGG R: CCTTCCCCTTAGCCCTCCCAT                                                                                           |
| ABI5 <sup>Δ344-376</sup>  | F: CAAGCATATACAGTGGAATTGGAAGC R: CCTTCCCCTTAGCCCTCCCATATCT                                                                                       |
| ABI5 <sup>Δ377-409</sup>  | F: CAACAGTATTTTGAGAGTTTGAAGTCAAG R: TTTTCTTGCTCTAGATCTAGCAG                                                                                      |
| ABI5 <sup>Δ406-409</sup>  | F: CAACAGTATTTTGAGAGTTTGAAGTCAAG R: CTCCAACCTCCGCCAATGCA                                                                                         |
| ABI5 <sup>Δ406-442</sup>  | F: GACCCAGCTTTCTTGACAAAAGTTGG R: CTCCAACCTCCGCCAATGCA                                                                                            |
| ABI5 <sup>S42A</sup>      | F: GGGGAAGACAATCC <b>G</b> TATCTACTCATTG R: AAAGAAGTAAACGGATGATTCTCACCAC                                                                         |
| ABI5 <sup>S42D</sup>      | F: GGGGAAGACAATCC <b>G</b> A <b>T</b> ATCTACTCATTG R: AAAGAAGTAAACGGATGATTCTCACCAC                                                               |
| ABI5 <sup>S145A</sup>     | F: CCTCGACAAGGCGCTTTGACACTTCC R: AAGACTAGACTCGTTCGCTATCCCTCTCT                                                                                   |
| ABI5 <sup>S145D</sup>     | F: CCTCGACAAGGCG <b>A</b> TTT <b>G</b> ACACTTCC R: AAGACTAGACTCGTTCGCTATCCCTCTCT                                                                 |
| ABI5 <sup>T201A</sup>     | F: GCTAGACAACCG <b>G</b> CTTTTGGAGAGA R: CGCAGTCTCACCGCGTTCT                                                                                     |
| ABI5 <sup>T201D</sup>     | F: GCTAGACAACCG <b>G</b> A <b>T</b> TTTGGAGAGA R: CGCAGTCTCACCGCGTTCT                                                                            |
| ABI5 <sup>S439A</sup>     | F: GATGAGGAACCCG <b>G</b> CTTGCCACTC R: AATGTCCGCAATCTCCCGTTCCG                                                                                  |
| ABI5 <sup>S439D</sup>     | F: GATGAGGAACCCG <b>G</b> A <b>T</b> TG <b>T</b> CCACTC R: AATGTCCGCAATCTCCCGTTCCG                                                               |
| ABI5 <sup>K344/353A</sup> | F: GGTCCAGTGGAG <b>G</b> CAGTAGTGGAGA R: ATCCACTACTCTT <b>G</b> CCCTTCCCCT                                                                       |
| ABI5 <sup>K364/376A</sup> | F: GCTAGATCTAGAGCAAGAG <b>G</b> CACAAGCATAT R: AGCAGACTCGCGGTT <b>C</b> GC <b>G</b> ATCATCC                                                      |
| ABI5 <sup>K344A</sup>     | F: GGTCCAGTGGAGAAAGTAGTGGAGA R: ATCCACTACTCTT <b>G</b> CCCTTCCCCT                                                                                |
| ABI5 <sup>K353A</sup>     | F: GGTCCAGTGGAG <b>G</b> CAGTAGTGGAGA R: ATCCACTACTCTTTTCCCTTCCCCT                                                                               |
